# Supplementary material for: Comparing soil carbon loss through respiration and leaching under extreme precipitation events in arid and semiarid grasslands
Source: Copernicus journal article supplement (doi:10.5194/bg-15-1627-2018), 2018-03-16
Supplement: Supplementary file 1 [file bg-15-1627-2018-supplement.zip]

Archive with 3 entries (3 files):
- bg-15-1627-2018-supplement-title-page.pdf
- Soil carbon loss_SI_3rd_revision_v1_no marks.pdf
- Soil carbon loss_Dataset S1.xlsx
