# Supplementary material for: Comparing soil carbon loss through respiration and leaching under extreme precipitation events in arid and semiarid grasslands
Source: Copernicus journal article supplement (doi:10.5194/bg-15-1627-2018), 2018-03-16
Supplement: Supplementary file 1 [file bg-15-1627-2018-supplement.zip › bg-15-1627-2018-supplement-title-page.pdf]

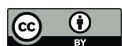

## *Supplement of*

# **Comparing soil carbon loss through respiration and leaching under extreme precipitation events in arid and semiarid grasslands**

**Ting Liu et al.**

*Correspondence to:* Xiaojuan Feng (xfeng@ibcas.ac.cn)

- [bg-15-1627-2018-supplement-title-page.pdf](#)
- [Soil carbon loss\\_Dataset S1.xlsx](#)
- [Soil carbon loss\\_SI\\_3rd\\_revision\\_v1\\_no marks.pdf](#)

The copyright of individual parts of the supplement might differ from the CC BY 4.0 License.
