# Supplementary material for: Comparing soil carbon loss through respiration and leaching under extreme precipitation events in arid and semiarid grasslands
Source: Copernicus journal article supplement (doi:10.5194/bg-15-1627-2018), 2018-03-16
Supplement: Supplementary file 1 [file bg-15-1627-2018-supplement.zip › Soil carbon loss_SI_3rd_revision_v1_no marks.pdf]

# Comparing soil carbon loss through respiration and leaching under extreme precipitation events in arid and semi-arid grasslands

Ting Liu<sup>1#</sup>, Liang Wang<sup>1#</sup>, Xiaojuan Feng<sup>1,2\*</sup>, Jinbo Zhang<sup>3</sup>, Tian Ma<sup>1,2</sup>, Xin Wang<sup>1,2</sup>, Zongguang Liu<sup>1</sup>

<sup>1</sup> State Key Laboratory of Vegetation and Environmental Change, Institute of Botany, Chinese Academy of Sciences, Beijing 100093, China,

<sup>2</sup> University of Chinese Academy of Sciences, Beijing, China,

<sup>3</sup> School of Geography Sciences, Nanjing Normal University, Nanjing 210023, China

# co-first authors with equal contributions

\* Correspondence to: Xiaojuan Feng ([xfeng@ibcas.ac.cn](mailto:xfeng@ibcas.ac.cn))

## Contents of this file

Table S1 to S2

Figure S1 to S6

## Additional Supporting Information (Files upload separately)

Dataset S1

## Introduction

The supplementary material contains Table S1-S2, Figures S1-S6, and Dataset S1. Table S1 presents the major ion concentrations of the artificial rainwater used for the simulated extreme precipitation events (EPEs). Table S2 shows proportion of outgassed CO<sub>2</sub> in total dissolved inorganic carbon under given pH, temperature and alkaline conditions. Fig. S1 provides the locations of sample sites and their mean annual precipitation (MAP) levels. Fig. S2 provides daily and monthly precipitation in Xilinhot. Fig. S3 shows soil respiration rate variation after EPEs. Fig. S4 shows the variations of litter-derived and SOC-derived CO<sub>2</sub> release with time in litter-amended GC soils during the first EPE. Fig. S5 provides information on soil carbon content in each column. Fig. S6 provides information on cumulative respiration in soils of different treatments. Dataset S1 (separate file) shows data displayed in the figures of main text and supporting information.

**Table S1: Major ion concentrations ( $\mu\text{mol L}^{-1}$ ) of the artificial rainwater used for the simulated extreme precipitation events (EPEs).**

| Ion                        | For XLHT and KQ soils | For GC soils |
|----------------------------|-----------------------|--------------|
| $\text{Ca}^{2+}$           | 113                   | 180          |
| $\text{Mg}^{2+}$           | 17                    | 37           |
| $\text{Na}^+ + \text{K}^+$ | 41                    | 87           |
| $\text{HCO}_3^-$           | 180                   | 12           |
| $\text{Cl}^-$              | 45                    | 75           |
| $\text{SO}_4^{2-}$         | 161                   | 67           |

**Table S2: Proportion of dissolved CO<sub>2</sub> in total dissolved inorganic carbon under the given pH, temperature and alkalinity conditions.**

| pH <sup>a</sup> | T <sup>b</sup> | Alkalinity <sup>c</sup><br>(μmol/L) | Proportion of dissolved CO <sub>2</sub> (%) <sup>d</sup> | Partial Pressure of CO <sub>2</sub> <sup>d</sup><br>(μatm) |
|-----------------|----------------|-------------------------------------|----------------------------------------------------------|------------------------------------------------------------|
| 9.0             | 23             | 300                                 | 0.2                                                      | 18                                                         |
| 8.5             | 23             | 300                                 | 0.7                                                      | 59                                                         |
| 7.5             | 23             | 300                                 | 6.8                                                      | 601                                                        |
| 9.0             | 23             | 500                                 | 0.2                                                      | 29                                                         |
| 8.5             | 23             | 500                                 | 0.7                                                      | 98                                                         |
| 7.5             | 23             | 500                                 | 6.8                                                      | 1002                                                       |
| 9.0             | 23             | 1000                                | 0.2                                                      | 58                                                         |
| 8.5             | 23             | 1000                                | 0.7                                                      | 195                                                        |
| 7.5             | 23             | 1000                                | 6.8                                                      | 2004                                                       |
| 9.0             | 23             | 2000                                | 0.2                                                      | 117                                                        |
| 8.5             | 23             | 2000                                | 0.7                                                      | 391                                                        |
| 7.5             | 23             | 2000                                | 6.8                                                      | 4008                                                       |
| 9.0             | 23             | 3000                                | 0.2                                                      | 175                                                        |
| 8.5             | 23             | 3000                                | 0.7                                                      | 586                                                        |
| 7.5             | 23             | 3000                                | 6.8                                                      | 6013                                                       |
| 9.0             | 23             | 7000                                | 0.2                                                      | 409                                                        |
| 8.5             | 23             | 7000                                | 0.7                                                      | 1368                                                       |
| 7.5             | 23             | 7000                                | 6.8                                                      | 14029                                                      |

<sup>a</sup>: pH of the soil leachates in this study, pH<sub>XLHT</sub> ~ 9, pH<sub>KQ</sub> ~ 7.6, pH<sub>GC</sub> ~ 8.6;

<sup>b</sup>: incubation temperature;

<sup>c</sup>: alkalinity range of natural and soil waters.

<sup>d</sup>: calculation of partial pressure and proportion of dissolved CO<sub>2</sub> was based on equations in Ran et al. (2015).

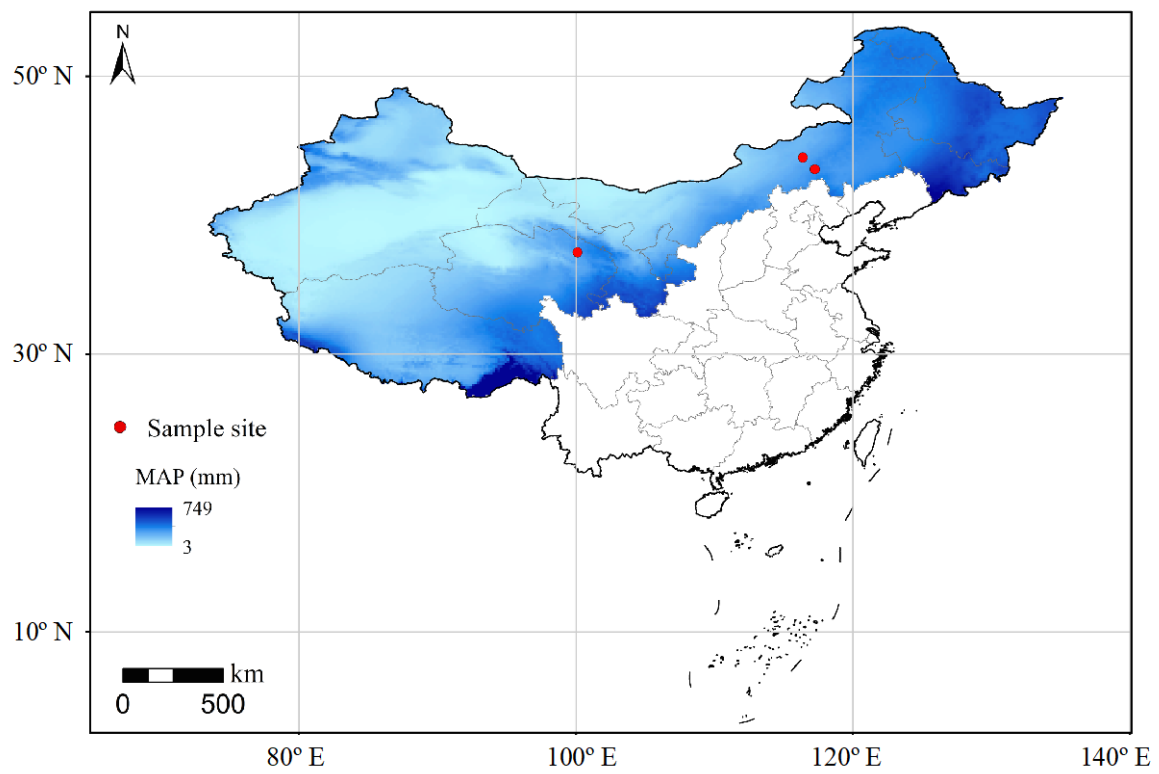

**Figure S1: Map of sampling sites and their mean annual precipitation (MAP) levels.**

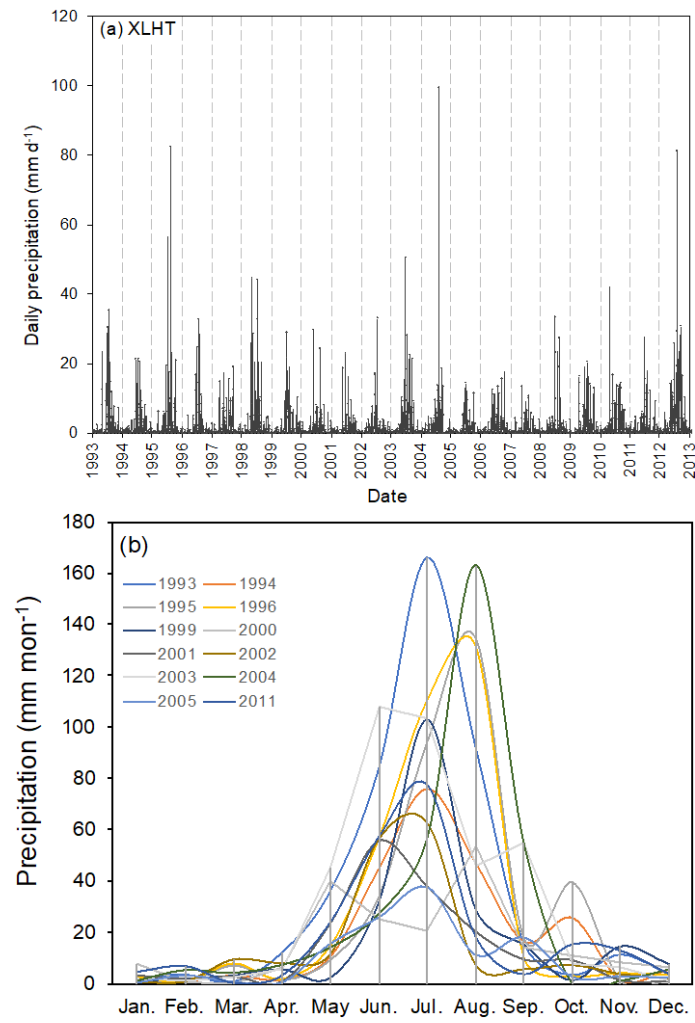

**Figure S2: Variation of the daily precipitation (a) and monthly precipitation (b) during recent two decades at Xilinhot in Inner Mongolia (data modified from <http://data.cma.cn/data/index/6d1b5efbdcbf9a58.html>).**

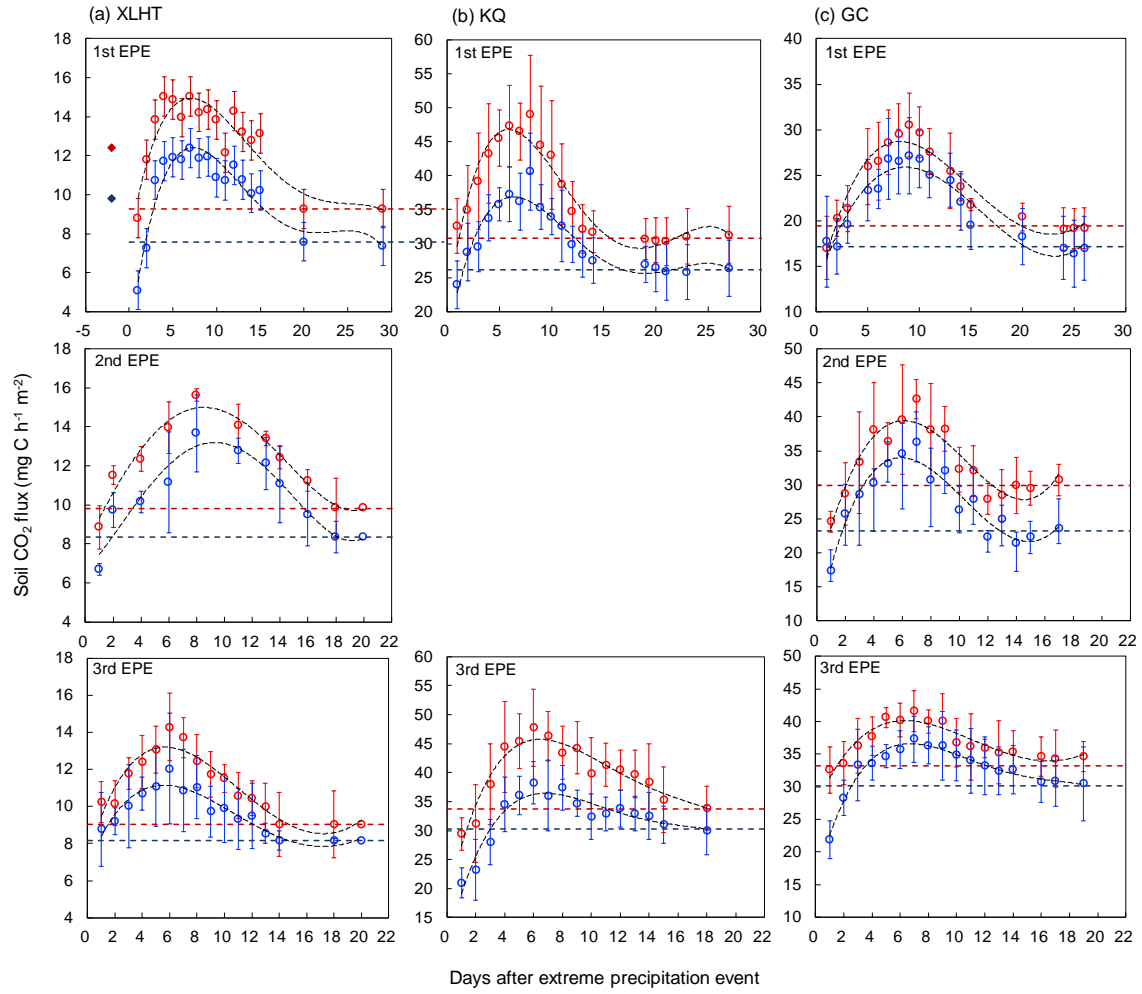

**Figure S3: Variations of soil CO<sub>2</sub> release rate after the simulated extreme precipitation events (EPEs). Red and blue dots represent respiration in the litter-amended and non-amended soils, respectively. Mean values are shown with standard error (n = 3). Red and blue dash lines represent the stabilized respiration rate after EPEs in the litter-amended and non-amended soils, respectively. Black dash lines represent regressive lines using polynomial fitting method.**

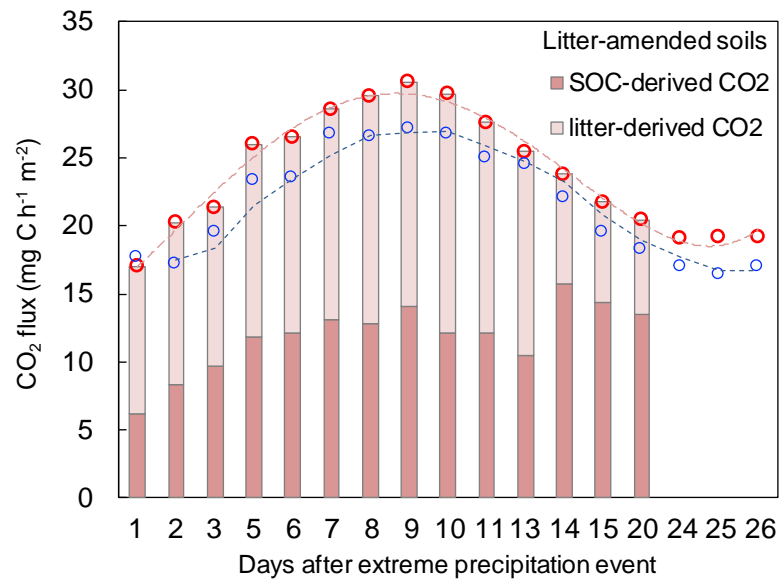

**Figure S4: Variations of litter-derived and SOC-derived CO<sub>2</sub> release with time in litter-amended GC soils during the first EPE. Red and blue dots represent respiration in the litter-amended and non-amended soils, respectively. Red and blue dash lines represent regressive lines using polynomial fitting method.**

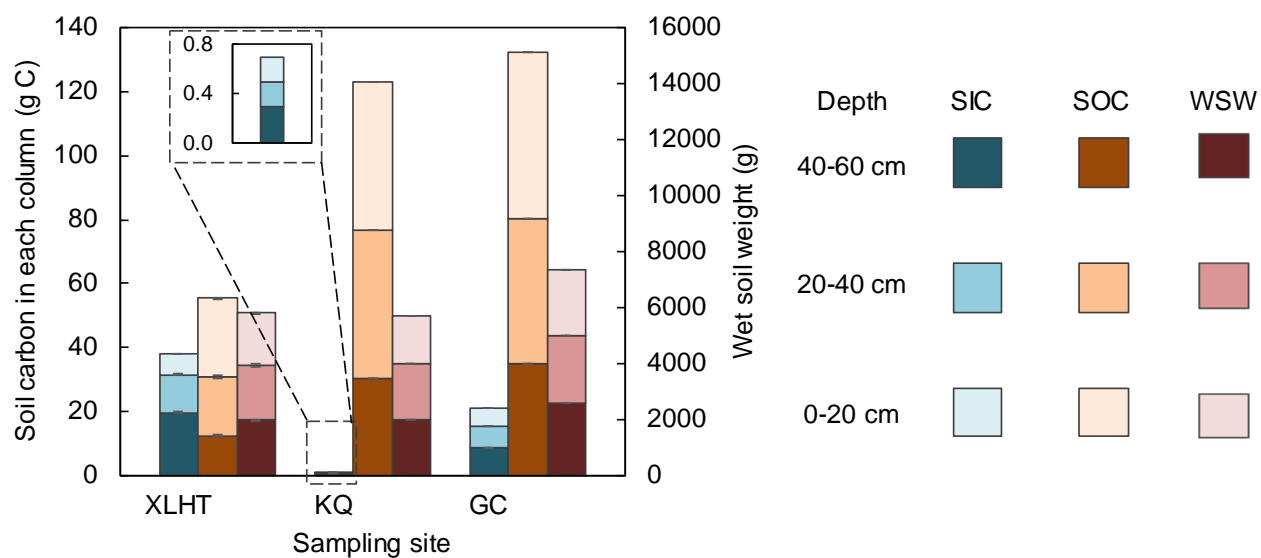

**Figure S5: Total amount of soil organic carbon (SOC), soil inorganic carbon (SIC), and wet soil weight (WSW) in different layers of the artificial soil columns.**

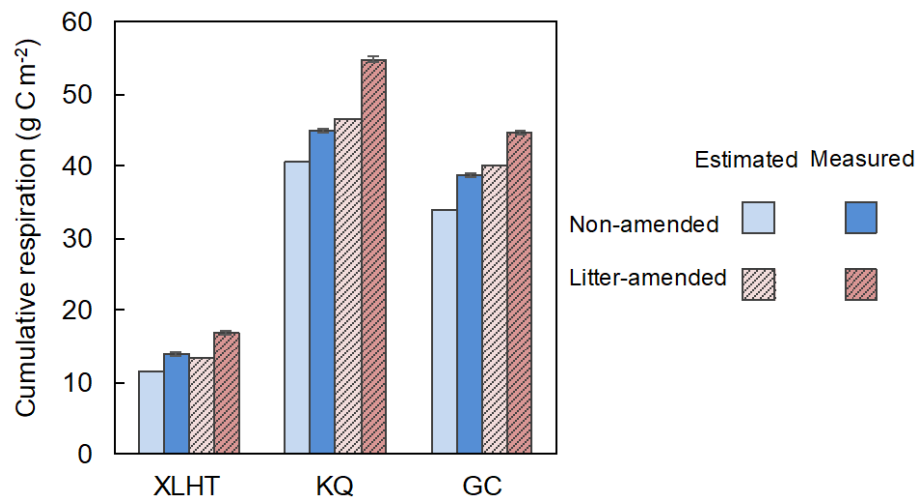

Figure S6: Cumulative respiration in the non-amended and litter-amended soils during the first 20 days after three extreme precipitation events (EPEs) relative to that estimated using basal respiration rates stabilized after EPEs. Mean values are shown with standard error (n = 3).
